# Supplementary material for: Gradual Carotid Artery Stenosis in Mice Closely Replicates Hypoperfusive Vascular Dementia in Humans
Source: PubMed Central journal article supplement — J Am Heart Assoc. 2016 Feb 22;5(2):e002757. doi: 10.1161/JAHA.115.002757 (PMC4802480; doi:10.1161/jaha.115.002757), 2016-02-22
Supplement: JAH3-5-e002757-s002.pdf [file JAH3-5-e002757-s002.pdf]

## Supplemental Material

### Gradual Carotid Artery Stenosis in Mice Closely Replicates Hypoperfusive Vascular Dementia in Humans

Yorito Hattori, MD, PhD<sup>1</sup>; Jun-ichiro Enmi, PhD<sup>2</sup>; Satoshi Iguchi, PhD<sup>2</sup>; Satoshi Saito, MD<sup>3</sup>;  
Yumi Yamamoto, PhD<sup>3</sup>; Masahiro Tsuji, MD, PhD<sup>3</sup>; Kazuyuki Nagatsuka, MD, PhD<sup>1</sup>;  
Rajesh N Kalaria, MD, PhD<sup>4</sup>; Hidehiro Iida, PhD, DSc<sup>2</sup>; Masafumi Ihara, MD, PhD, FACP<sup>1,3</sup>

<sup>1</sup> Department of Stroke and Cerebrovascular Diseases, National Cerebral and Cardiovascular Center

<sup>2</sup> Department of Investigative Radiology, National Cerebral and Cardiovascular Center

<sup>3</sup> Department of Regenerative Medicine, National Cerebral and Cardiovascular Center

<sup>4</sup> Institute of Neuroscience, Newcastle University, Campus for Ageing & Vitality

Corresponding author: Masafumi Ihara; Department of Stroke and Cerebrovascular Diseases, National Cerebral and Cardiovascular Center; 5-7-1 Fujishiro-dai, Suita, Osaka 565-8565, Japan; Telephone, (+81)-6-68335012; Fax, (+81)-6-68355137; E-mail, [ihara@ncvc.go.jp](mailto:ihara@ncvc.go.jp)

## **Supplemental Movie Legend**

Supplemental Video S1: Surgical implantation of ameroid constrictor (AC)

Through a midline cervical incision, a left common carotid artery (CCA) is exposed and freed from their sheaths including left vagus nerve. A 4-0 silk suture is placed around the CCA. The artery was gently lifted by this suture, the AC is implanted surgically on the CCA, and the suture is removed.
